# Supplementary material
Source: PubMed Central journal article supplement (PMC4686256)
Supplement: NIHMS704868-supplement-1.pdf [file NIHMS704868-supplement-1.pdf]

## Supplemental Figure 1: CD14<sup>+</sup> CD16<sup>+</sup> co-localization with additional cell markers

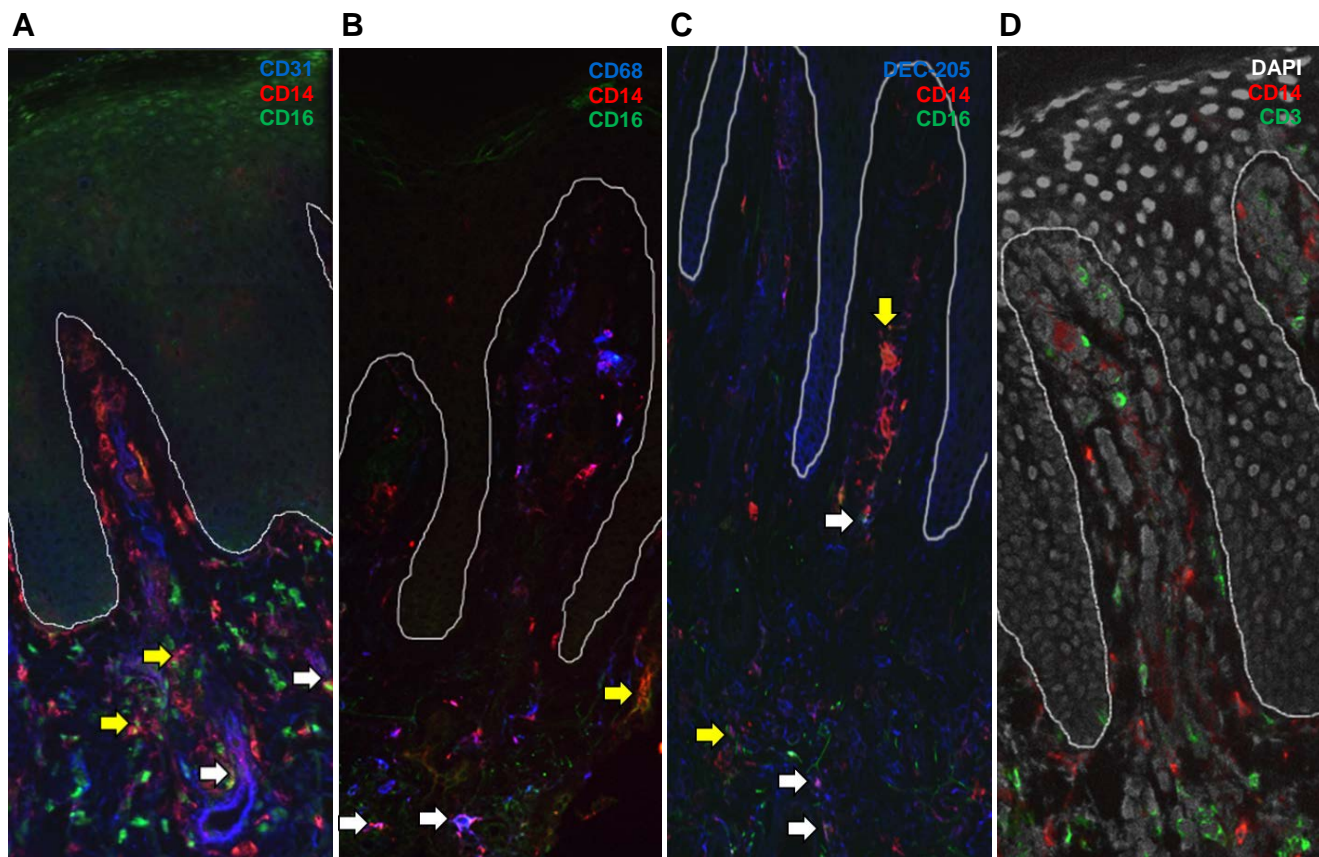

**Supplemental Figure 1: CD14, CD16, and CD3 staining with CD31, CD68, or DEC-205 co-localization.** (A) Frozen involved human psoriatic plaque stained for CD14 (red), CD16 (green), and CD31 (blue) to identify vasculature (n=3). (B) Frozen involved human psoriatic plaque stained for CD14 (red), CD16 (green), and the macrophage marker, CD68 (blue) (n=2). (C) Frozen involved human psoriatic plaque stained for CD14 (red), CD16 (green), and the DC marker, DEC-205 (blue) (n=2). (D) CD14<sup>++</sup> cells do not co-localize with CD3<sup>+</sup> cells in involved psoriasis tissue. Frozen involved human psoriatic plaque stained for CD14 (red) and CD3 (green) with nuclei stained by DAPI (white) (n=3). In all sections, yellow arrows indicate double positive CD14/CD16 staining while white arrows indicate triple positive cells.

## Supplemental Figure 2: Gating Strategy

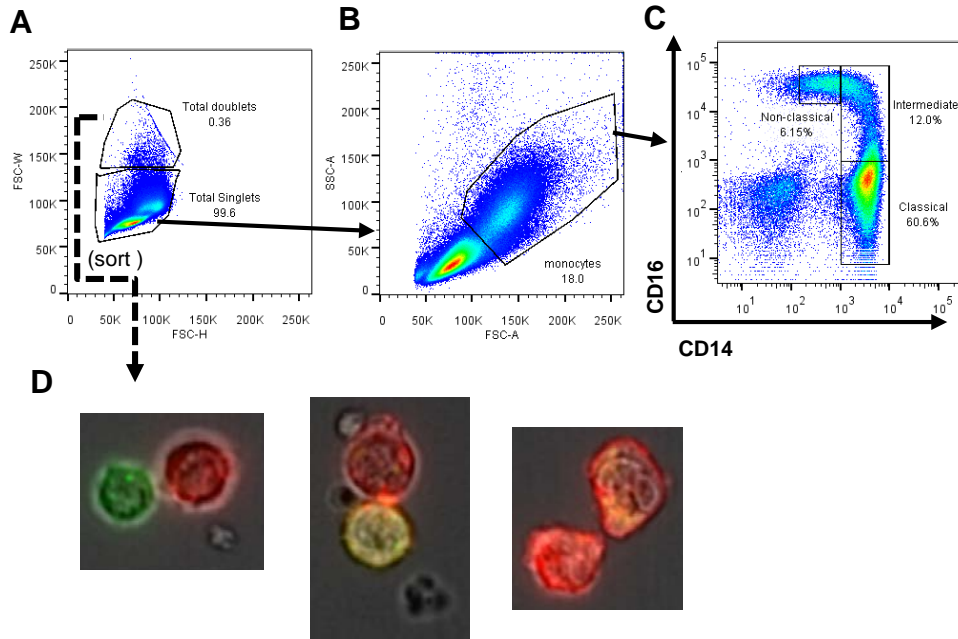

**Supplemental Figure 2: Monocyte and doublet gating strategy.** (A) All PBMC events are gated on FSC-W vs. FSC-H to separate singlets from doublets. (B) Monocytes are electronically selected based on their SSC-A vs. FSC-A profile. (C) The left side of the classical population gate is determined based on CD14 isotype and the upper limit is determined by CD16 isotype. The intermediate population gate is also determined by CD14 isotype combined with all events above the CD16 isotype. The non-classical population is determined by the CD14 isotype for the right side of the gate and negative events for the left side of the gate. (D) Representative images obtained on the Amnis Imagestream cytometer of cells in the doublet gate post-sort demonstrating the doublet population used in subsequent transcriptomic analyses. Dotted line in panel A indicates doublet gate used in sort.

## Supplemental Table I: Demographics

|                                  | Number | Age<br>(mean $\pm$ STD) | Gender                               | Mean PASI       | Mean Duration of Disease (years) |
|----------------------------------|--------|-------------------------|--------------------------------------|-----------------|----------------------------------|
| <b>Original Cohort</b>           |        |                         |                                      |                 |                                  |
| <b>Control</b>                   | 23     | 29.8 $\pm$ 7.6          | 10 male (43.5%)<br>13 female (56.5%) | N/A             | N/A                              |
| <b>Psoriasis</b>                 | 19     | 43.4 $\pm$ 12.3         | 11 male (57.9%)<br>8 female (42.1%)  | 11.7 $\pm$ 12.9 | 19.8 $\pm$ 11.2                  |
| <b>PCR Array Cohort</b>          |        |                         |                                      |                 |                                  |
| <b>Control</b>                   | 5      | 39.6 $\pm$ 9.5          | 3 Male (60%)<br>2 Female (40%)       | N/A             | N/A                              |
| <b>Psoriasis</b>                 | 5      | 42.2 $\pm$ 11.4         | 3 Male (60%)<br>2 Female (40%)       | 6.3 $\pm$ 5.9   | 10.0 $\pm$ 7.2                   |
| <b>HMVEC-D co-culture Cohort</b> |        |                         |                                      |                 |                                  |
| <b>Control</b>                   | 4      | 32.8 $\pm$ 9.3          | 1 male (25%)<br>3 female (75%)       | N/A             | N/A                              |

\*Note: One of the psoriasis patients from the PCR cohort (first on the heatmap) was on Soriatine at the time of the blood draw for a non-psoriasis condition

**Supplemental Table II: Antibodies used in Flow Cytometry and Immunofluorescence**

| Target         | Fluorophore  | Company     | Clone       | Cat #         | Application    | Corresponding Isotype                     | Company           | Cat #      |
|----------------|--------------|-------------|-------------|---------------|----------------|-------------------------------------------|-------------------|------------|
| <b>CD3</b>     | PerCP        | BD          | SP34-2      | 552851        | Flow Cytometry | <i>Used in Amnis analysis, no isotype</i> | ---               | ---        |
| <b>CD3</b>     | unconjugated | BD          | UCHT1       | 550368        | Confocal       | Goat-anti-mouse IgG1-A488 (1:2000)        | Invitrogen        | A21121     |
| <b>CD11b</b>   | APC-Cy7      | BD          | ICRF44 (44) | 580914        | Flow Cytometry | APC-Cy7 Ms IgG1k                          | BD                | 557873     |
| <b>CD11c</b>   | BV510        | BD          | B-ly6       | 563026        | Flow Cytometry | BV510 Ms IgG1k                            | BD                | 562946     |
| <b>CD14</b>    | Alexa 488    | BD          | M5E2        | 557700        | Flow Cytometry | Alexa 488 Ms IgG2ak                       | BD                | 557703     |
| <b>CD14</b>    | APC          | Invitrogen  | Tuk4        | MHCD1405      | Confocal       | Goat-anti-mouse IgG2a-A647 (1:300)        | Invitrogen        | A21241     |
| <b>CD16</b>    | eFluor 450   | ebio        | CB16        | 8048-0168-025 | Flow Cytometry | Mouse IgG1k e450                          | ebio              | 48-4714-82 |
| <b>CD16</b>    | FITC         | Invitrogen  | 3G8         | MHCD1601      | Confocal       | Goat-anti-mouse IgG1-Anti-FITC (1:200)    | Invitrogen        | A11096     |
| <b>CD18</b>    | PerCP        | Abcam       | GRF1        | ab91154       | Flow Cytometry | Mouse IgG1 PerCP                          | Abcam             | ab118658   |
| <b>CD31</b>    | unconjugated | R&D Systems | Polyclonal  | AF806         | Confocal       | Donkey-anti-sheep IgG-NL557 (1:1500)      | R&D Systems       | NL010      |
| <b>CD42b</b>   | PE           | eBio        | HIP1        | 12-0429       | Flow Cytometry | <i>Used in Amnis analysis, no isotype</i> | ---               | ---        |
| <b>CD56</b>    | APC/Cy7      | Biolegend   | HCD56       | 318331        | Flow Cytometry | <i>Used in Amnis analysis, no isotype</i> | ---               | ---        |
| <b>CD68</b>    | unconjugated | BD          | Y1/82A      | 566059        | Confocal       | Chicken-anti-goat IgG-A594 (1:150)        | Life Technologies | A21468     |
| <b>DEC-205</b> | unconjugated | AbD Serotec | MG38        | MCA-2258      | Confocal       | Goat-anti-mouse IgG2b-568 (1:200)         | Invitrogen        | A21144     |
| <b>ICAM-1</b>  | APC          | eBio        | HA58        | 17-0549-41    | Flow Cytometry | Mouse IgG1 K Isotype Control APC          | ebio              | 17-4714    |
| <b>VCAM-1</b>  | PE           | BD          | 51-10C9     | 561679        | Flow Cytometry | PE Mouse IgG1, κ Isotype Control          | BD                | 555749     |
| <b>VLA-4</b>   | BV510        | BD          | 9F10        | 563458        | Flow Cytometry | BV510 Ms IgG1k                            | BD                | 562946     |
